# Supplementary figures and images for: Inhibition of α‐Synuclein Accumulation Improves Neuronal Apoptosis and Delayed Postoperative Cognitive Recovery in Aged Mice
Source: Hindawi journal article supplement (doi:10.1155/2021/5572899), 2021-01-01

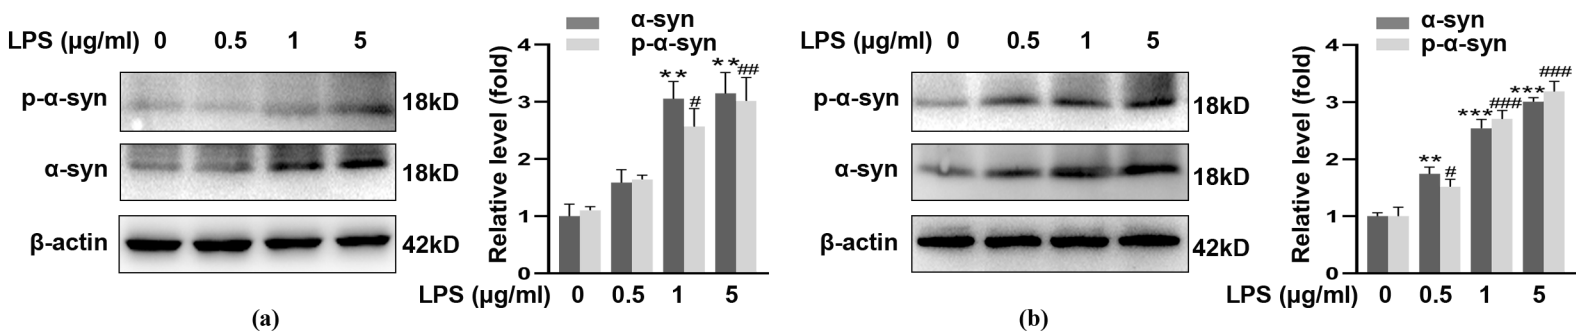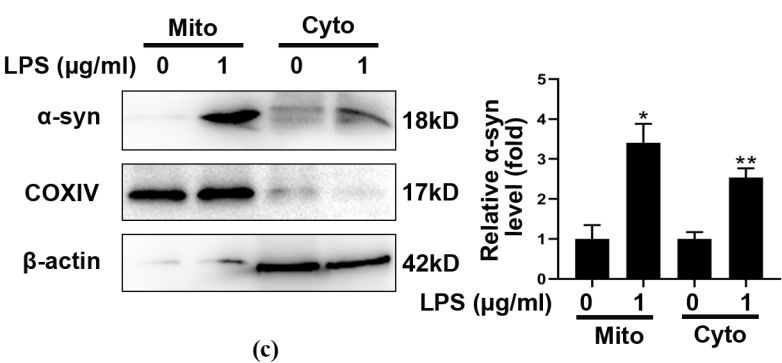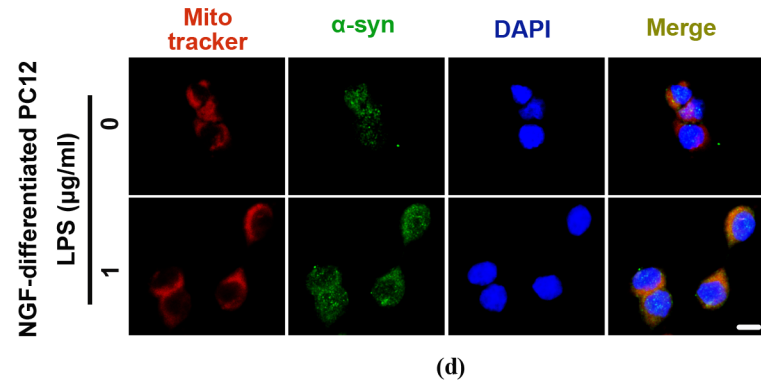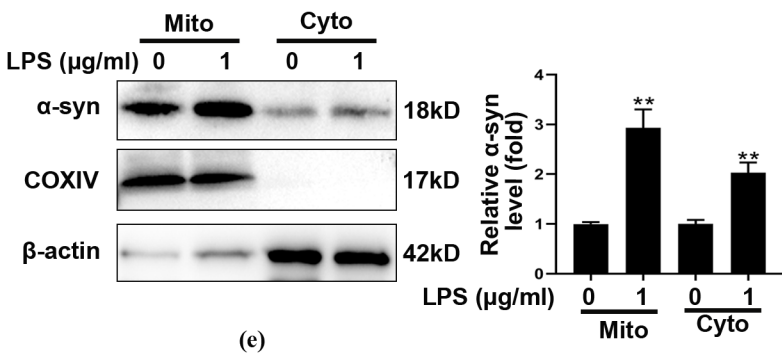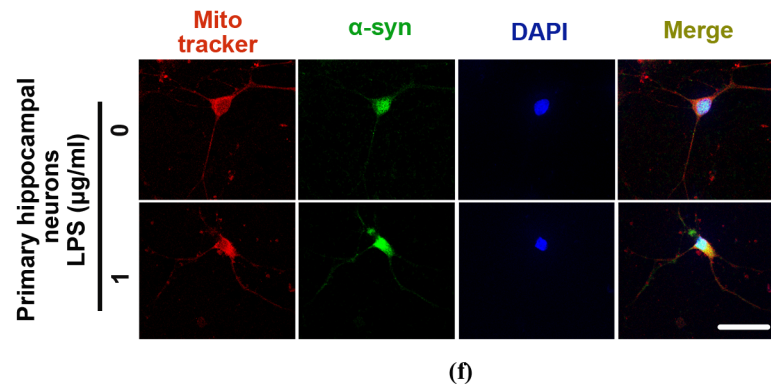

Supplement: f1 [file 5572899.f1.zip]

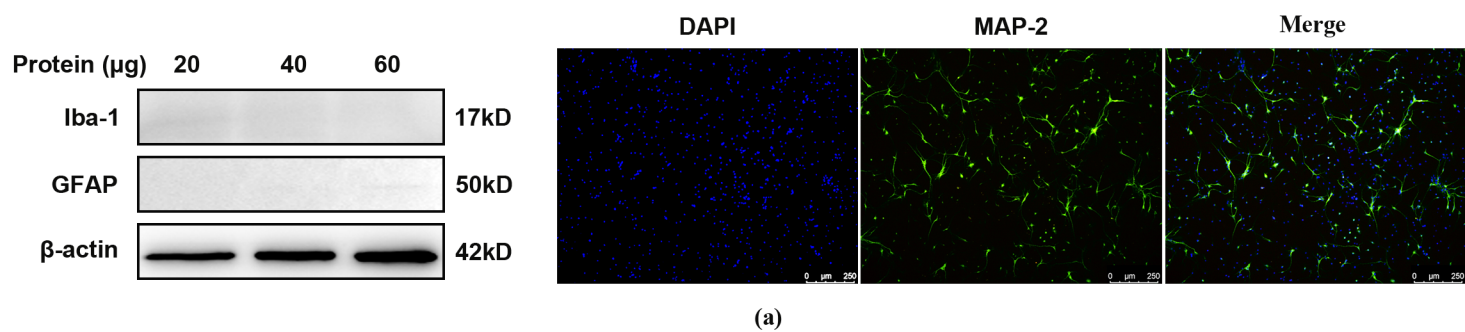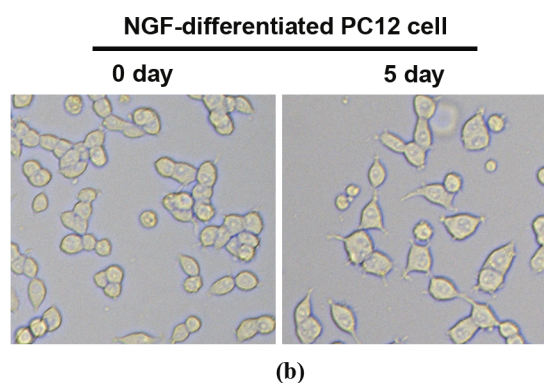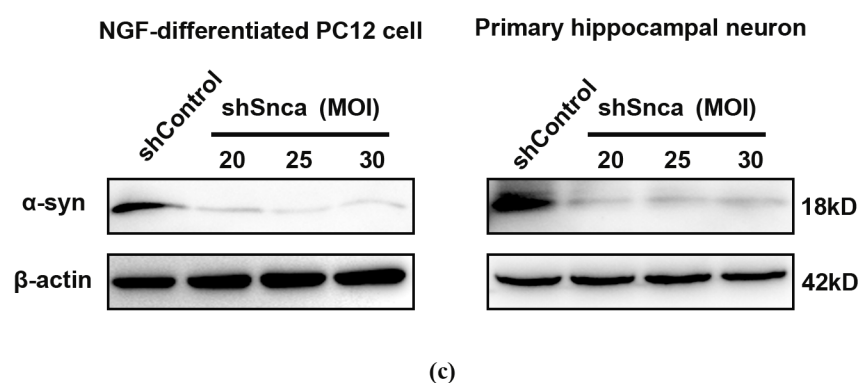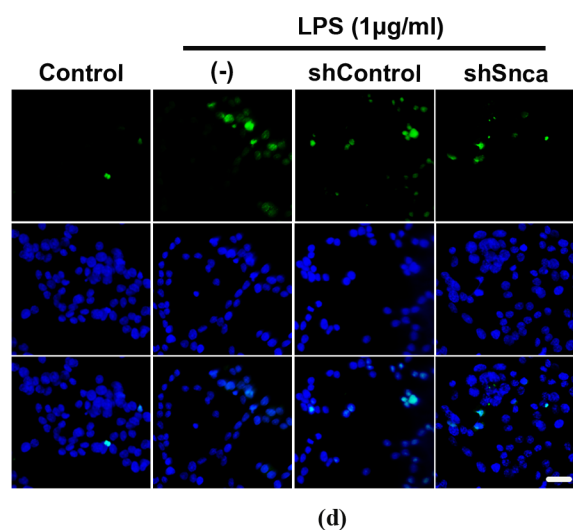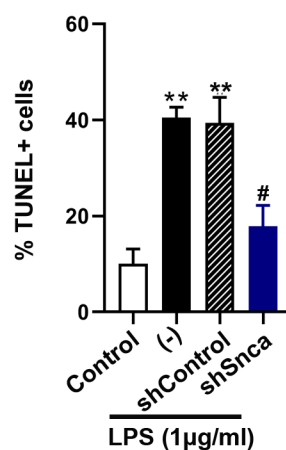

Supplement: f1 [file 5572899.f1.zip]

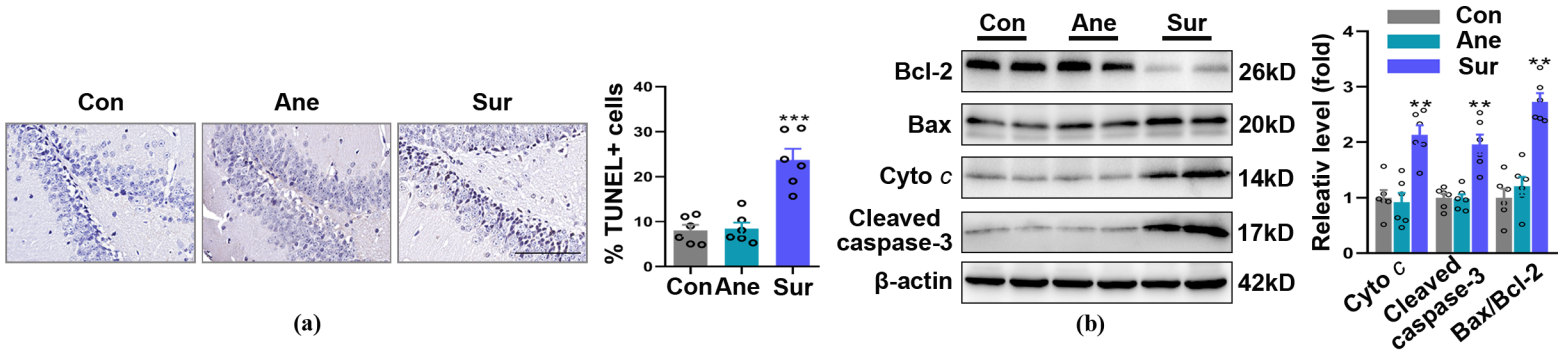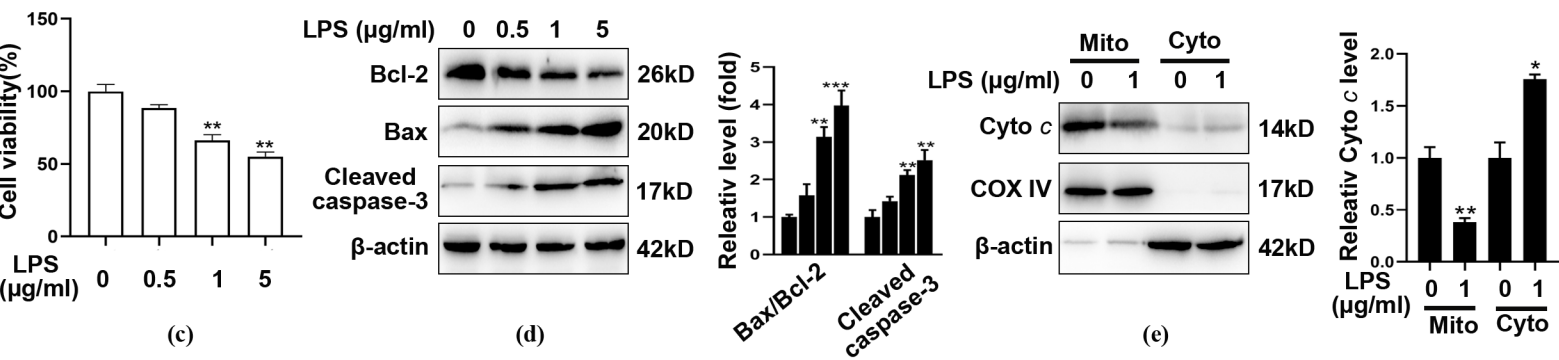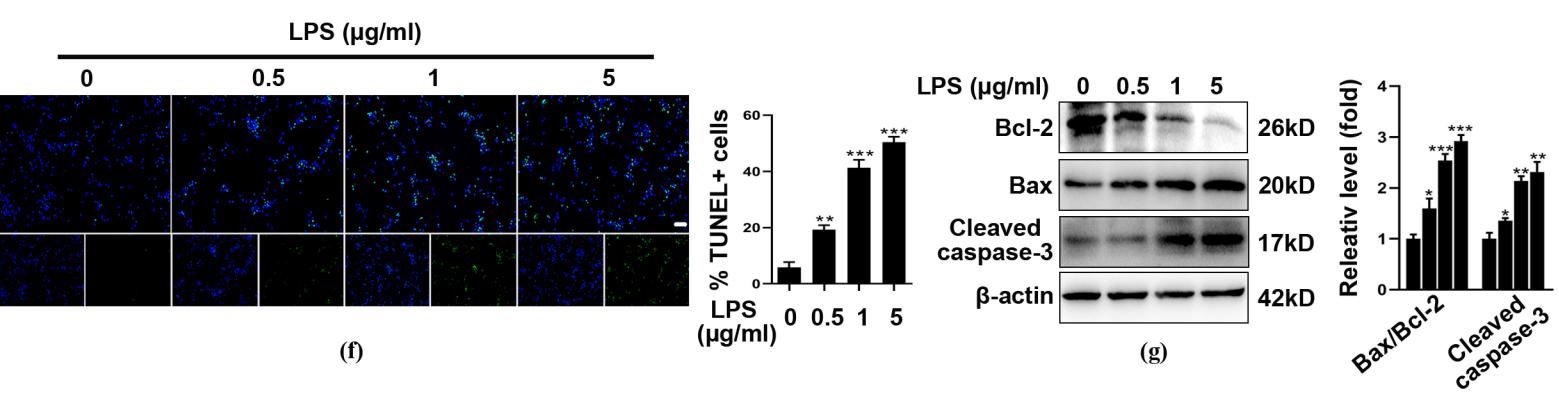

Supplement: f1 [file 5572899.f1.zip]
